# Supplementary material
Source: PubMed Central journal article supplement (PMC4367930)
Supplement: NIHMS336668-supplement-Example1.pdf [file NIHMS336668-supplement-Example1.pdf]

## MISFISHIE Example 1

Revised: 2008-08-14

This document is a MISFISHIE-compliant dataset example.

### 1. Experiment Design:

- A. Experiment Description: **An immunohistochemistry comparison of antibodies CD49a and CD90 in 4 different normal human prostate tissue sections.**
- B. Assay Type(s): Immunohistochemistry
- C. Experiment Type: **Comparison of multiple tissue specimens and antibodies**
- D. Experimental factors: **antibody; specimen**
- E. Total number of assays performed: **4**
- F. URL for more information: <http://scgap.systemsbiology.net/data/>
- G. Contact information: **Alvin Liu, Institute for Systems Biology, 1441 N 34th St, Seattle WA 98103 (aliu systemsbiology.org)**

### 2. Biomaterials and Treatments:

- A.i. Attributes of the individuals

| Specimen Designator | Tissue Type            | Organism     | Sex  | Age   |
|---------------------|------------------------|--------------|------|-------|
| 99-010E             | Normal Prostate Glands | Homo sapiens | Male | 55-65 |
| 99-047D             | Normal Prostate Glands | Homo sapiens | Male | 65-75 |
| 99-066C             | Normal Prostate Glands | Homo sapiens | Male | 45-55 |
| 99-068D             | Normal Prostate Glands | Homo sapiens | Male | 55-65 |

- A.ii. Physiological state: **Normal**
- A.iii. Relevant exogenous factors: **None**
- A.iv. Anatomic source of specimens: **Human prostate**
- A.v. Provider of the specimens: **All specimens obtained from the University of Washington Medical Center:**
- B. Physiological state: **normal**
- Assay preparation protocol: **Upon receipt of the radical prostatectomy specimen 3 mm thick transverse sections are made after inking the exterior surface (the surgical margin). Tissue blocks from the posterior aspect of each alternate transverse section are embedded in OCT that is immersed in isopentane that is precooled in liquid nitrogen. This procedure, which takes 10 to 20 minutes, maximizes the rate of cooling of the tissue. The frozen tissue blocks are assigned an anonymized code. To assess the feasibility of sorting cancer cell populations by flow cytometry, only tumors with a relatively large volume (approximately 1 cc) in a single focus are used. Tissue enriched for cancer, where at least 85% of the cells in the corresponding frozen section are cancer cells and the tissue sample weighs at least 100 mg, is dissected from the opposing aspect of the non-fixed section that is adjacent to the block of tissue that was frozen. For immunohistochemistry, multiple 5-micron thin serial sections are cut and fixed in cold acetone for 10 minutes. After air drying these are kept in a -20C freezer until used for immunostaining.**

### 3. Reporter information:

- A. Unambiguous reporter identification: **See table below**
- B. Full sequence or clone if of the reporters: **See table below**
- C. Protocol for obtaining exact reporters: **Monoclonal antibodies purchased from BD Pharmingen**  
<http://wwwbdbiosciences.com/pharmingen/>
- D. Other important attributes: **Monoclonal**

| Antibody Name | Ref DB      | Accession | Origin        | Vendor Details                                                                                                                                                                                          |
|---------------|-------------|-----------|---------------|---------------------------------------------------------------------------------------------------------------------------------------------------------------------------------------------------------|
| CD49a         | Entrez Gene | 3672      | BD Pharmingen | <a href="http://wwwbdbiosciences.com/external_files/pm/doc/tds/ihc/live/web_enabled/75311E_550568.pdf">http://wwwbdbiosciences.com/external_files/pm/doc/tds/ihc/live/web_enabled/75311E_550568.pdf</a> |
| CD90          | Entrez Gene | 7070      | BD Pharmingen | <a href="http://wwwbdbiosciences.com/external_files/pm/doc/tds/ihc/live/web_enabled/74851E_550402.pdf">http://wwwbdbiosciences.com/external_files/pm/doc/tds/ihc/live/web_enabled/74851E_550402.pdf</a> |

### 4. Staining protocols and parameters:

- A. Detection method: **See protocol**
- B. Staining protocol: **1. Let frozen slides equilibrate at room temperature for 15 min. 2. Fix in cold acetone for 10 min. 3. Rinse with PBS [10X = 1.3M NaCl (38g), 20mM KCl (0.75g), 80mM Na2HPO4 (5.7g), 10mM KH2PO4 (0.68G) pH 7.4 w/NaOH in 500mL]. 4. Quench in H2O2, 1uL stock 30% H2O2 in 1mL PBS, 15min. 5. Rinse with PBS 6. Add blocking**

solution, 200uL, 30min. 7. Rinse with PBS. 8. Add primary antibody 0.4ug in 50uL 0.1% BSA-PBS. 30 min. 9. Rinse with PBS. 10. Add secondary antibody 1uL biotinylated anti-mouse Ig + 180uL PBS + 20uL horse serum, 100uL per slide, 30 min. 11. Rinse with PBS. 12. Make Vector detection solution 30 min before use, 5uL bottle A + 5uL bottle B + 500uL PBS, 30 min, then dilute with 2mL PBS. 13. Add Vector ABC, 30 min. 14. Rinse with PBS. 15. Add DAB solution (aliquot 0.5mL from -20C 5 min before use), <8 min. 16. Rinse in H2O. 17. Counterstain 30 sec in hematoxylin. 18. Rinse in H2O. 19. 5 sec in bluing. 20. rinses (10 dips) in H2O, 95% EtOH (2X), 100% EtOH (3X), xylene (2X). 21. Mount with coverslip.

| Slide Designator | Specimen Designator | Number of Antibodies | Antibodies |
|------------------|---------------------|----------------------|------------|
| CD90 99-010E 1   | 99-010E             | 1                    | CD90       |
| CD90 99-047D 1   | 99-047D             | 1                    | CD90       |
| CD49a 99-066C 1  | 99-066C             | 1                    | CD49a      |
| CD49a 99-068D 1  | 99-068D             | 1                    | CD49a      |

## 5. Imaging data and parameters:

- A. Digital images for each assay: See table below
- B. Detection Method: See full protocol below
- C. Image acquisition protocol: 1. Turn on power to the digital camera (Spot Insight Color, Model 3.2.0., No. 206510) and microscope (B Olympus BH2 Compound Microscope, No. 4D02712). 2. Open "SpotAdvanced" imaging application (Ver 3.5.2) from the desktop (the software will warn you if the camera is not on. If the camera is on, a LIVE window will pop up). 3. Place slide under scope to determine its tissue type (labeling on the slide itself will most often disclose the tissue type, but it is best to make sure). 4. Examine specimen under low magnification to get a feel for which cell types were captured and which are visible. 5. Position slide so that multiple cell types (or a specific cell type if you're looking for a particular type) are visible through the eye piece. Compare this image with that in the Spot LIVE window, and focus the scope according to the live image. 6. Use the "SNAP" button in the Spot application window to capture images. 7. Take both low and high magnification images of cell types of interest. Typically, one image on low (40x) magnification, and three to five images on higher (100,200,400x) magnification will suffice. (The magnifications are the objective power multiplied by the eyepiece, which is typically 10x). Use your judgement and capture images of interesting cell types: for example, intensely stained cells, lightly-stained cells, cells that are not stained, areas that contain cancer, take high mag images of areas that are indistinguishable under low mag, etc. 8. Save image according to the "Immunostain Image Filename Convention", to a folder titled "IMAGES TO EDIT", so that the images may be selected at a later time to crop or edit in Adobe Illustrator. 9. Once all images have been taken for a particular slide, remove the slide from the scope and use a marking pen to write "IS" for "image saved" on the slide itself. This way, one will be sure not to take images of the same slide twice. 10. When finished, exit Spot and turn off the microscope and camera.

| Image Designator       | Slide Designator | Magnification | Image                     |
|------------------------|------------------|---------------|---------------------------|
| CD90 99-010E HP a- 40  | CD90 99-010E 1   | 40            | <a href="#">IMAGE URL</a> |
| CD90 99-047D HP a- 40  | CD90 99-047D 1   | 40            | <a href="#">IMAGE URL</a> |
| CD49a 99-066C HP a- 40 | CD49a 99-066C 1  | 40            | <a href="#">IMAGE URL</a> |
| CD49a 99-068D HP a- 40 | CD49a 99-068D 1  | 40            | <a href="#">IMAGE URL</a> |

## 6. Image Characterizations:

- A. Definition of structural units:

| Structural Unit             | Definition                                                                                                                                                                                                                      |
|-----------------------------|---------------------------------------------------------------------------------------------------------------------------------------------------------------------------------------------------------------------------------|
| Atrophic glands             | Benign glands lined by an apparent single layer of predominantly basal cells that form a flat epithelium.                                                                                                                       |
| Hyperplastic glands         | Glands that exhibit luminal cell hyperplasia forming micropapillary protrusions into gland.                                                                                                                                     |
| Normal glands               | Neither atrophic nor hyperplastic glands.                                                                                                                                                                                       |
| Basal Epithelial Cells      | A layer of small, often inconspicuous epithelial cells adjacent to the basement membrane and subjacent to the luminal/secretory epithelial cells. The basal cells are the presumed progenitor cells of the prostate epithelium. |
| Stromal Fibromuscular Cells | The spindle cells that comprise the interstitium in which the prostate ducts and glands are embedded.                                                                                                                           |
| Stromal Endothelial Cells   | The cells that line the lumen of all blood vessels.                                                                                                                                                                             |
| Stromal Perineural Cells    | The outermost layer of stromal cells that surround peripheral nerves                                                                                                                                                            |
| Stromal Nerve Sheath Cells  | Spindle cells that surround axonal processes of nerves.                                                                                                                                                                         |

See also: <http://scgap.systemsbiology.net/ontology/Glossary.php>

• B. Definition of intensity scale:

| Intensity Unit | Definition                                                                                                                                                                                                                                                       |
|----------------|------------------------------------------------------------------------------------------------------------------------------------------------------------------------------------------------------------------------------------------------------------------|
| Intense        | Immunoreaction deposit is distinctly more optically dense than background and than tissue that does not express the antigen.                                                                                                                                     |
| Equivocal      | Immunoreaction deposit is either similar enough in optical density to the background and/or to tissue that does not express the antigen, or is so focal, i.e. < 5% of cells, that there is reasonable uncertain regarding whether the cells express the antigen. |
| None           | There is either no immunoreaction deposit or reaction product is no more optically dense than background.                                                                                                                                                        |

• C. Characterization of results in tabular form:

| Stain Name      | Antibody Name | Structural Unit             | Intense Staining Percent | Equivocal Staining Percent | None Staining Percent |
|-----------------|---------------|-----------------------------|--------------------------|----------------------------|-----------------------|
| CD49a 99-066C 1 | CD49a         | Atrophic glands             | 0                        | 0                          | 100                   |
| CD49a 99-066C 1 | CD49a         | Normal glands               | 0                        | 0                          | 100                   |
| CD49a 99-066C 1 | CD49a         | Hyperplastic glands         | 0                        | 0                          | 100                   |
| CD49a 99-066C 1 | CD49a         | Basal Epithelial Cells      | 0                        | 0                          | 100                   |
| CD49a 99-066C 1 | CD49a         | Stromal Fibromuscular Cells | 95                       | 5                          | 0                     |
| CD49a 99-066C 1 | CD49a         | Stromal Endothelial Cells   | 0                        | 0                          | 100                   |
| CD49a 99-066C 1 | CD49a         | Stromal Perineural Cells    | 0                        | 50                         | 50                    |
| CD49a 99-066C 1 | CD49a         | Stromal Nerve Sheath Cells  | 0                        | 50                         | 50                    |
| CD49a 99-066C 1 | CD49a         | Gleason Pattern 4           | 0                        | 0                          | 100                   |
| CD49a 99-066C 1 | CD49a         | Gleason Pattern 3           | 0                        | 0                          | 100                   |
| CD49a 99-068D 1 | CD49a         | Atrophic glands             | 0                        | 0                          | 100                   |
| CD49a 99-068D 1 | CD49a         | Normal glands               | 0                        | 0                          | 100                   |
| CD49a 99-068D 1 | CD49a         | Hyperplastic glands         | 0                        | 0                          | 100                   |
| CD49a 99-068D 1 | CD49a         | Basal Epithelial Cells      | 0                        | 0                          | 100                   |
| CD49a 99-068D 1 | CD49a         | Stromal Fibromuscular Cells | 70                       | 30                         | 0                     |
| CD49a 99-068D 1 | CD49a         | Stromal Endothelial Cells   | 0                        | 0                          | 100                   |
| CD49a 99-068D 1 | CD49a         | Stromal Perineural Cells    | 0                        | 0                          | 100                   |
| CD49a 99-068D 1 | CD49a         | Stromal Nerve Sheath Cells  | 0                        | 0                          | 100                   |
| CD49a 99-068D 1 | CD49a         | Gleason Pattern 4           | 0                        | 0                          | 100                   |
| CD49a 99-068D 1 | CD49a         | Gleason Pattern 3           | 0                        | 0                          | 100                   |
| CD90 99-010E 1  | CD90          | Atrophic glands             | 0                        | 0                          | 100                   |
| CD90 99-010E 1  | CD90          | Normal glands               | 0                        | 0                          | 100                   |
| CD90 99-010E 1  | CD90          | Hyperplastic glands         | 0                        | 0                          | 100                   |
| CD90 99-010E 1  | CD90          | Basal Epithelial Cells      | 0                        | 0                          | 100                   |
| CD90 99-010E 1  | CD90          | Stromal Fibromuscular Cells | 10                       | 0                          | 90                    |
| CD90 99-010E 1  | CD90          | Stromal Endothelial Cells   | 0                        | 0                          | 100                   |
| CD90 99-010E 1  | CD90          | Stromal Perineural Cells    | 0                        | 0                          | 100                   |
| CD90 99-010E 1  | CD90          | Stromal Nerve Sheath Cells  | 95                       | 5                          | 0                     |
| CD90 99-010E 1  | CD90          | Gleason Pattern 3           | 0                        | 0                          | 100                   |
| CD90 99-047D 1  | CD90          | Atrophic glands             | 0                        | 0                          | 100                   |
| CD90 99-047D 1  | CD90          | Normal glands               | 0                        | 0                          | 100                   |
| CD90 99-047D 1  | CD90          | Hyperplastic glands         | 0                        | 0                          | 100                   |
| CD90 99-047D 1  | CD90          | Basal Epithelial Cells      | 0                        | 0                          | 100                   |
| CD90 99-047D 1  | CD90          | Stromal Fibromuscular Cells | 10                       | 0                          | 90                    |
| CD90 99-047D 1  | CD90          | Stromal Endothelial Cells   | 0                        | 0                          | 100                   |

|                |      |                            |    |   |     |
|----------------|------|----------------------------|----|---|-----|
| CD90 99-047D 1 | CD90 | Stromal Perineural Cells   | 0  | 0 | 100 |
| CD90 99-047D 1 | CD90 | Stromal Nerve Sheath Cells | 95 | 5 | 0   |
| CD90 99-047D 1 | CD90 | Gleason Pattern 4          | 0  | 0 | 100 |
| CD90 99-047D 1 | CD90 | Gleason Pattern 3          | 0  | 0 | 100 |
